# Supplementary material for: Genome-Wide Characterization and Functional Validation of the ACS Gene Family in the Chestnut Reveals Its Regulatory Role in Ovule Development
Source: MDPI journal article supplement (doi:10.3390/ijms25084454), 2024-04-18
Supplement: s1 [file s1]

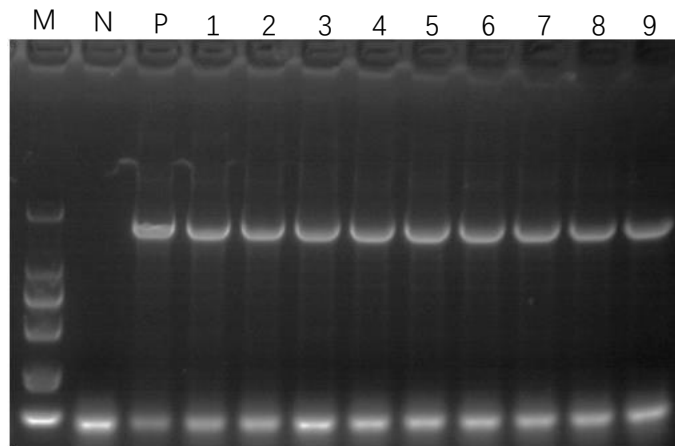

Figure S2. PCR identification of positive tomato plant with *CmACS7* gene

Note: Size of the target band:1629bp; M,marker, from top to bottom is 2000bp,1000bp,750bp; N, negative; P, positive; 1-9, Positive transgenic tomato lines
