# Supplementary material for: Genome-Wide Characterization and Functional Validation of the ACS Gene Family in the Chestnut Reveals Its Regulatory Role in Ovule Development
Source: MDPI journal article supplement (doi:10.3390/ijms25084454), 2024-04-18
Supplement: s1 [file s1]

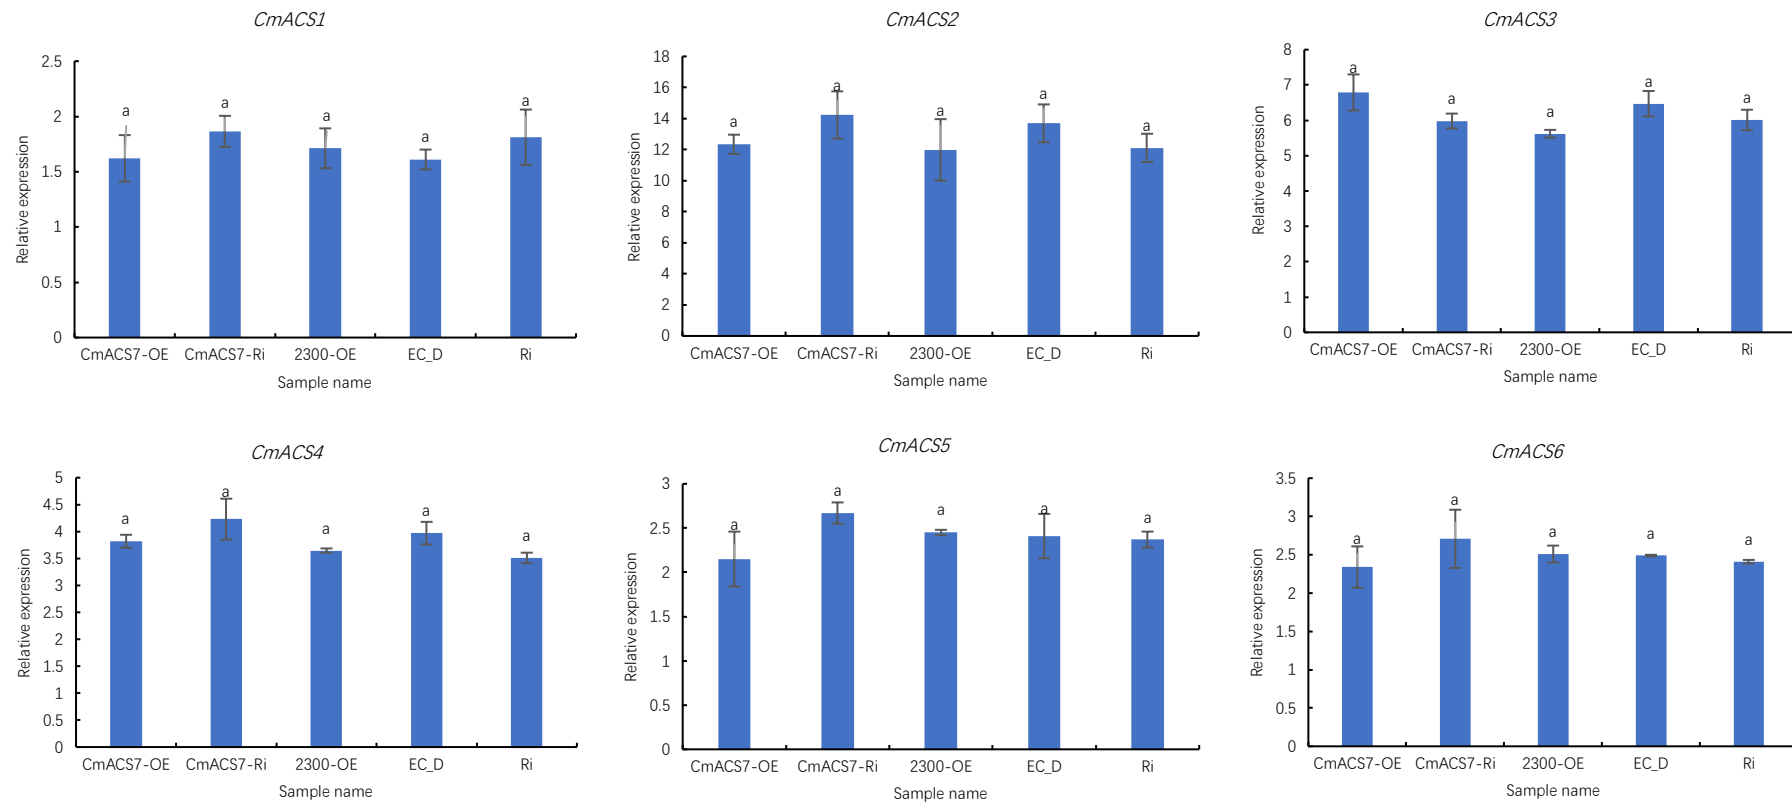

**Figure S1. Chestnut *CmACS* gene expression in different genetically transformed healing tissues.**

CmACS7-OE, CmACS7-Ri, 2300-OE, and Ri are represent the healing tissues of genetically transformed with *CmACS7* overexpression vectors, interference vectors, and their empty vectors, respectively; EC\_D is represents untreated healing tissue.
